# Supplementary material for: Hyperbranched polypeptides synthesized from phototriggered ROP of a photocaged Nε-[1-(2-nitrophenyl)ethoxycarbonyl]-l-lysine-N-carboxyanhydride: microstructures and effects of irradiation intensity and nitrogen flow rate
Source: Royal Society of Chemistry journal article supplement (doi:10.1039/c8py00641e), 2018-01-01
Supplement: c8py00641e1.pdf [file c8py00641e1.pdf]

# Hyperbranched Polypeptides Synthesized from Phototriggered ROP of a Photocaged $N_\epsilon$ -[1-(2-nitrophenyl)ethoxycarbonyl]-L-Lysine- $N$ -Carboxyanhydride: Microstructures and Effects of Irradiation Intensity and Nitrogen Flow Rate

Pan Li, Yingying Song, Chang-Ming Dong\*

## A Our previous work (*ACS Macro Lett.* 2017, 6, 292-297.)

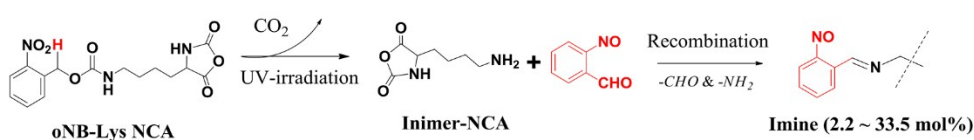

## In this work

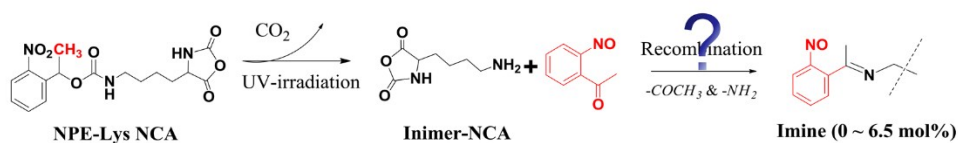

## B

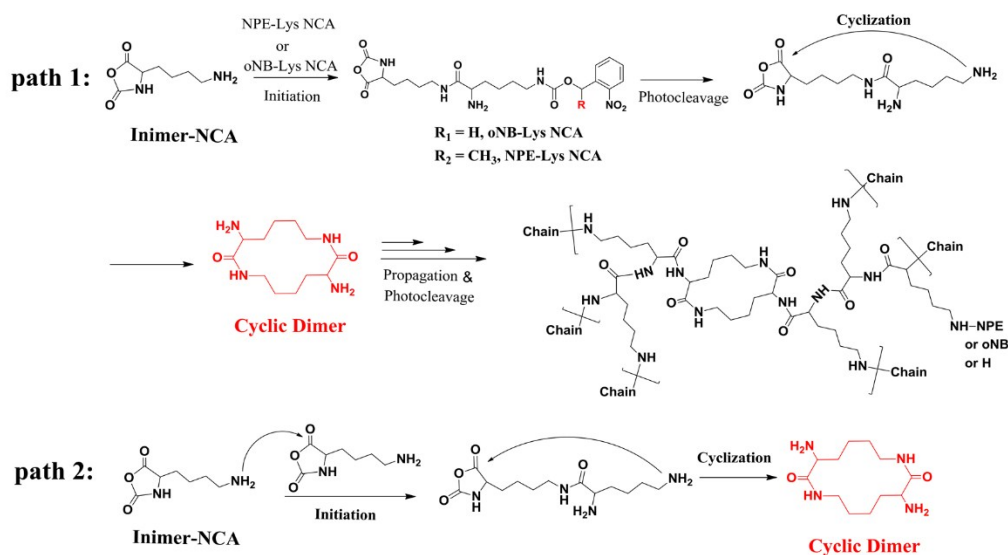

**Scheme S1.** The imination side reaction between photo-byproduct and amino groups during UV-triggered ROP (A) and the postulated pathways for forming the cyclic dimer initiating species during UV-triggered ROP (B).

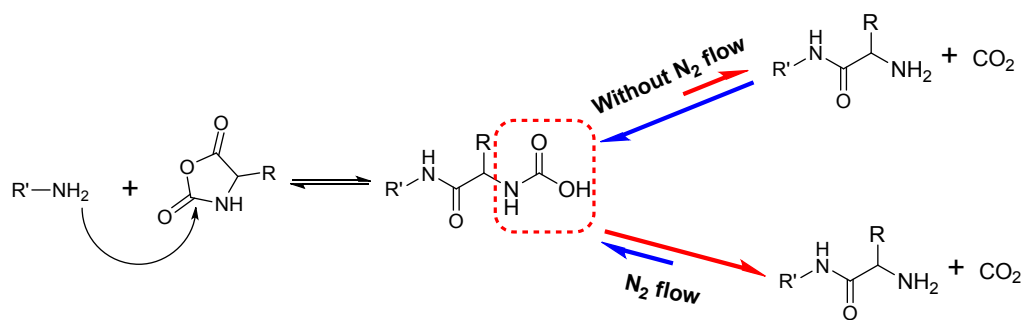

**Scheme S2.** The promoted normal amine mechanism of NCA ROP under  $N_2$  flow.

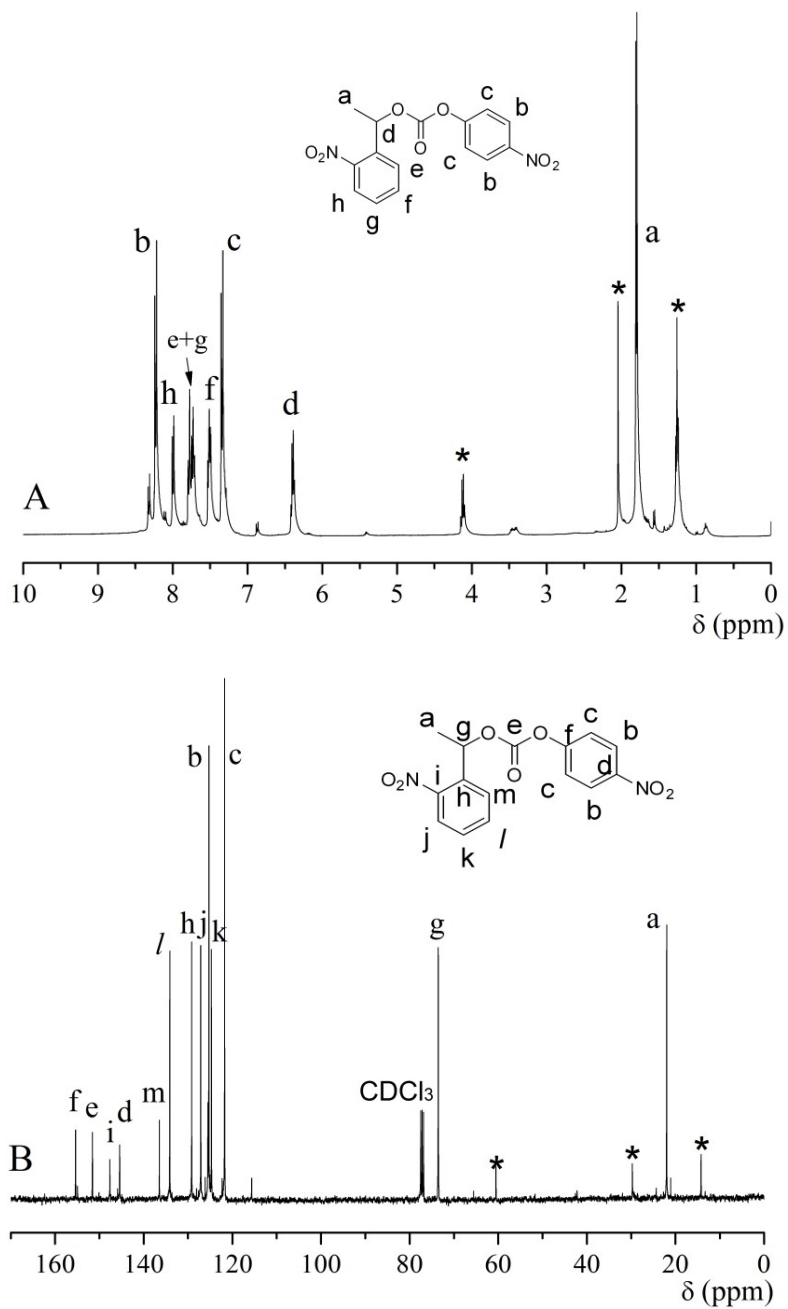

**Figure S1.**  $^1H$  NMR (A) and  $^{13}C$  NMR spectra of NPE-NPC ("\*" denotes the EtOAc solvent peaks).

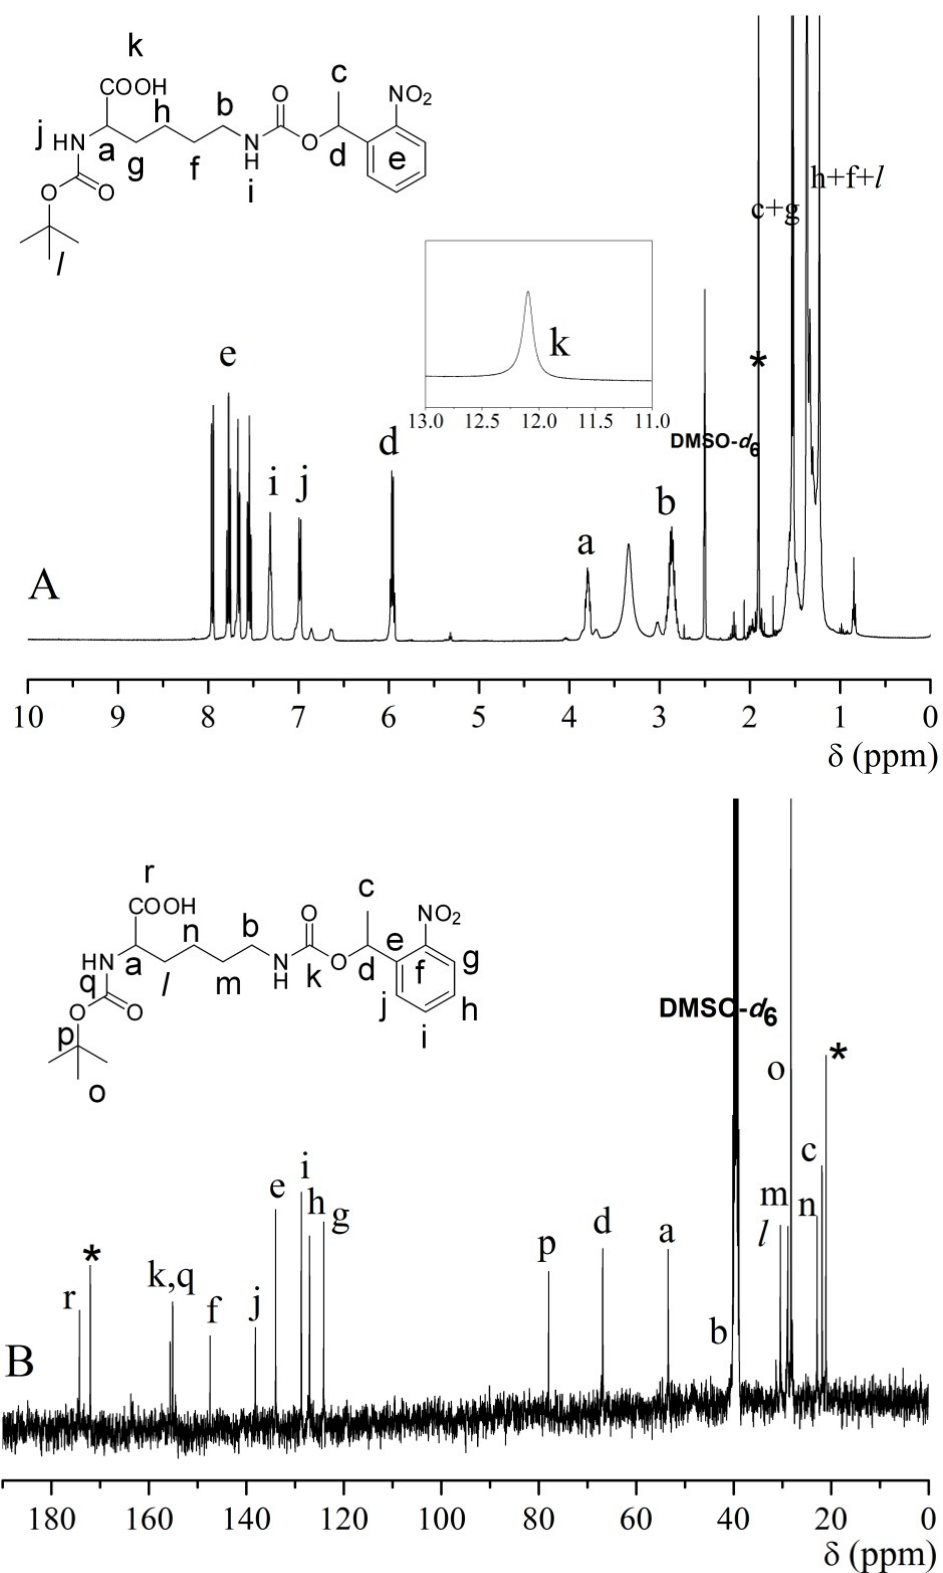

**Figure S2.**  $^1\text{H}$  NMR (A) and  $^{13}\text{C}$  NMR spectra of Boc-Lys(NPE)-OH (“\*” denotes the AcOH solvent peaks).

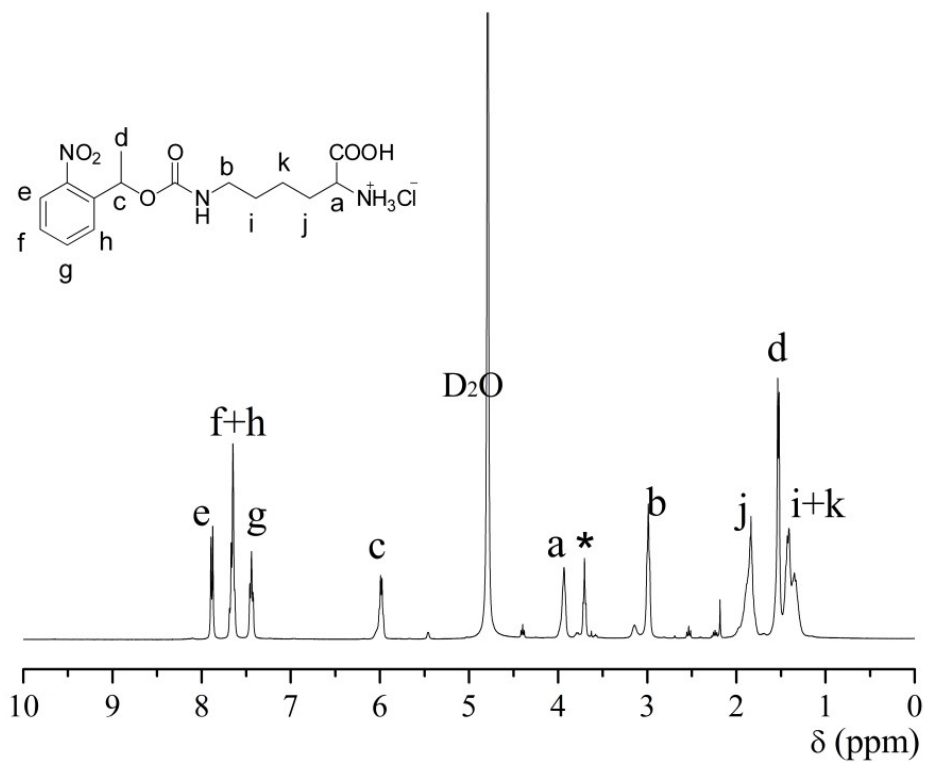

**Figure S3.** <sup>1</sup>H NMR spectrum of H-Lys(NPE)-OH·HCl (“\*” denotes the THF solvent peaks).

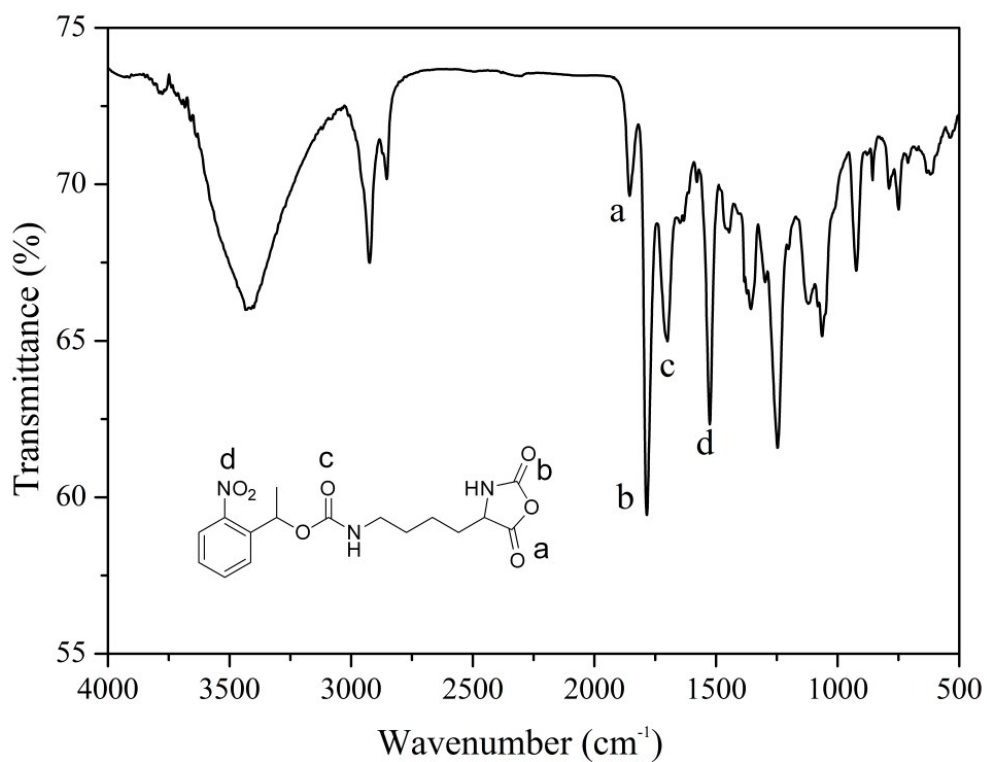

**Figure S4.** FT-IR spectrum of NPE-Lys NCA.

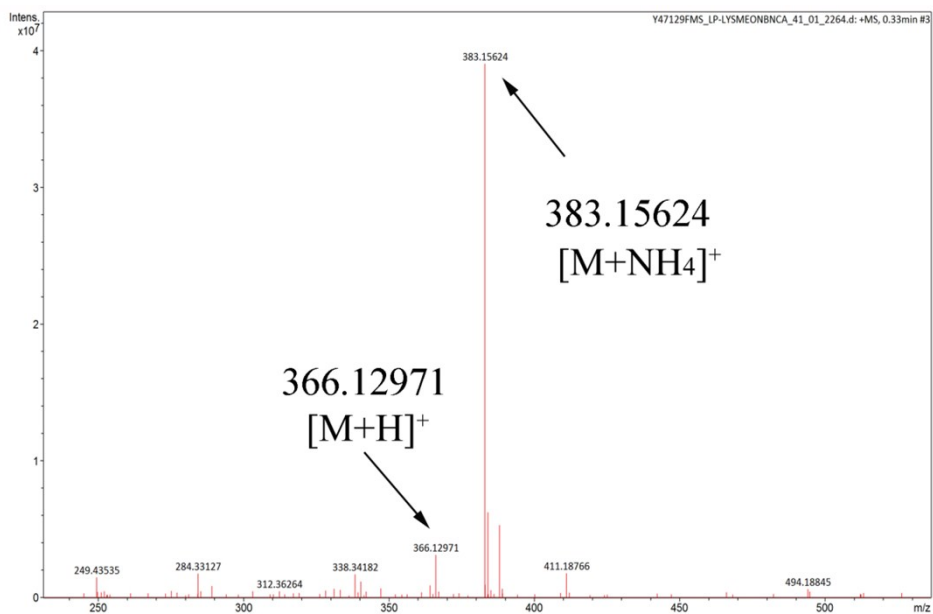

**Figure S5.** ESI-MS spectrum of NPE-Lys NCA.

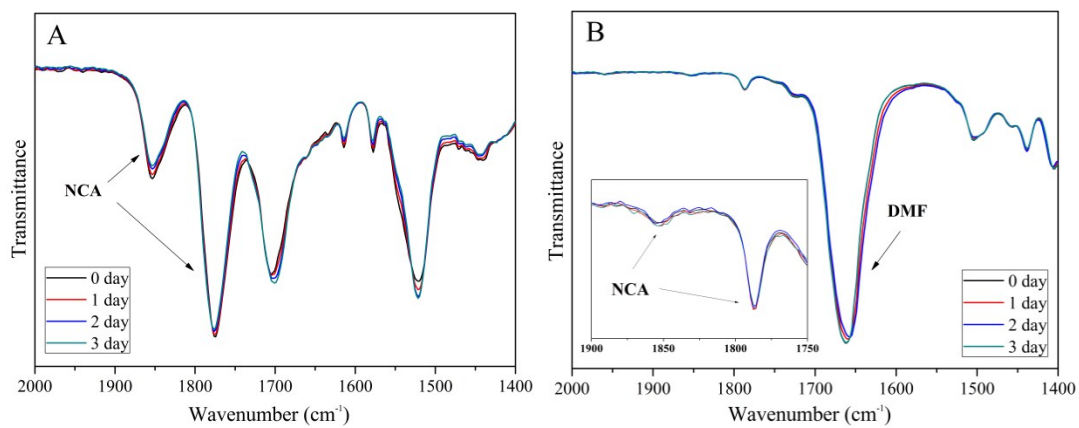

**Figure S6.** FT-IR monitoring the NPE-Lys NCA monomer consumption in the dark at 25 °C in both acetone (A) and DMF solution (B).

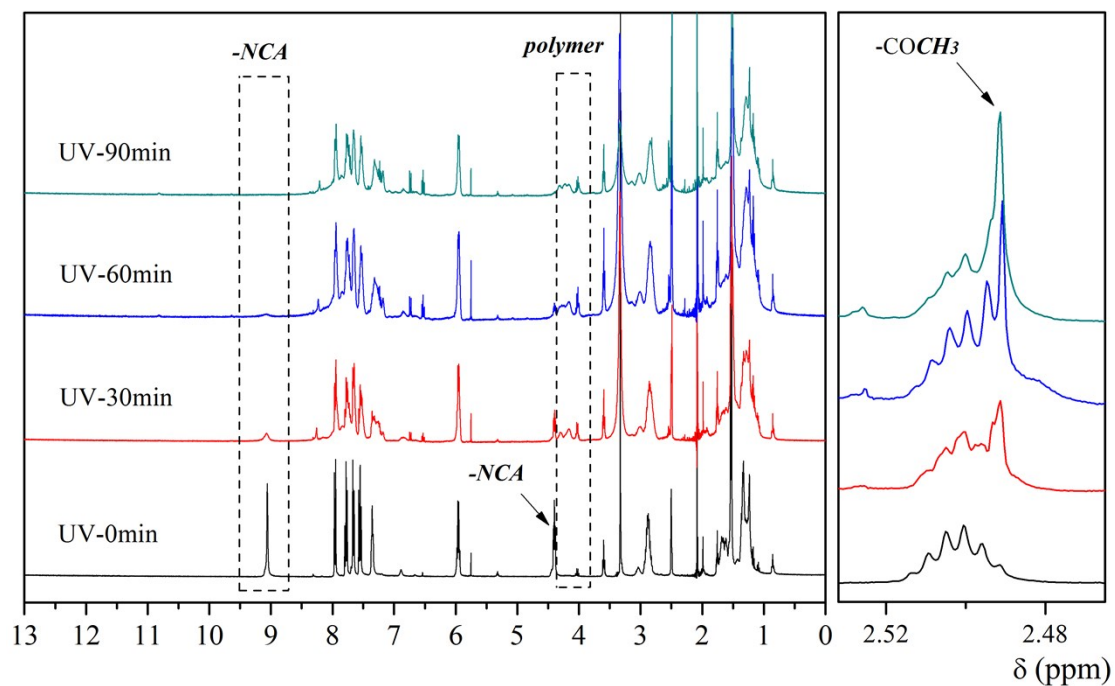

**Figure S7.**  $^1\text{H}$  NMR spectra of NPE-Lys NCA in acetone upon 365 nm UV-irradiation at  $16\text{ mW/cm}^2$  for different irradiation times.

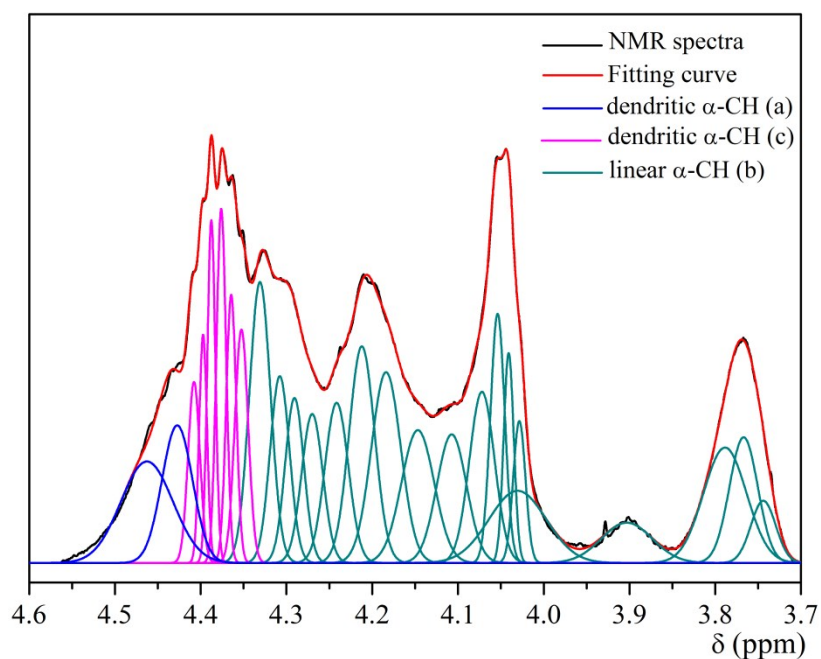

**Figure S8.** Peak fitting for  $\alpha\text{-CH}$  in the  $^1\text{H}$  NMR spectrum of sample P12 to calculate DB value by using software PeakFit (v 4.12).

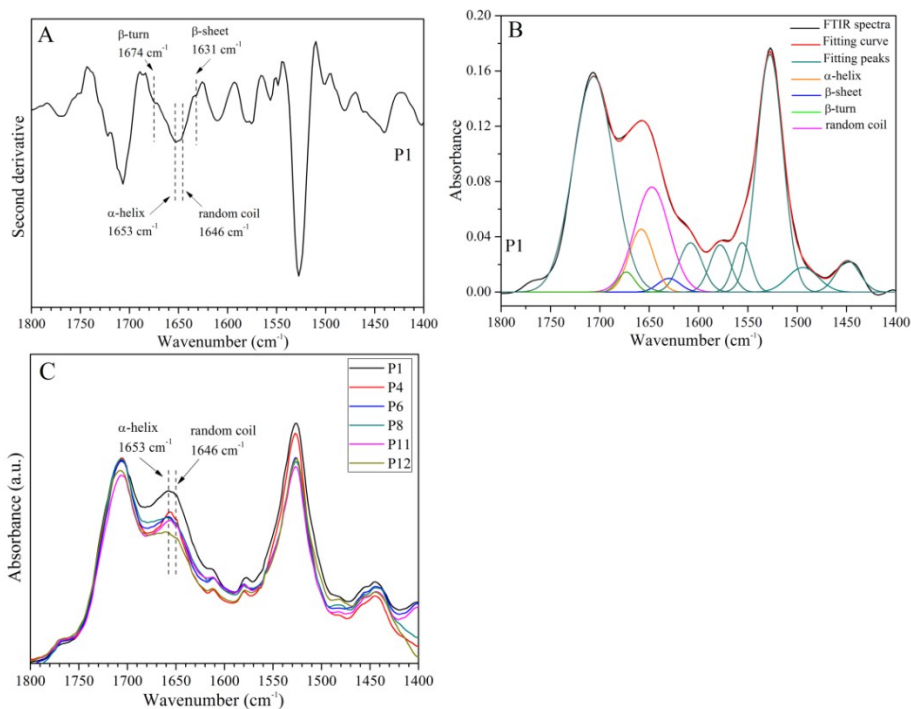

**Figure S9.** Second derivative (A) and FT-IR peak fitting results (B) of P1 in the solid state; and FT-IR spectra of P1, P4, P6, P8, P11 and P12 (C).

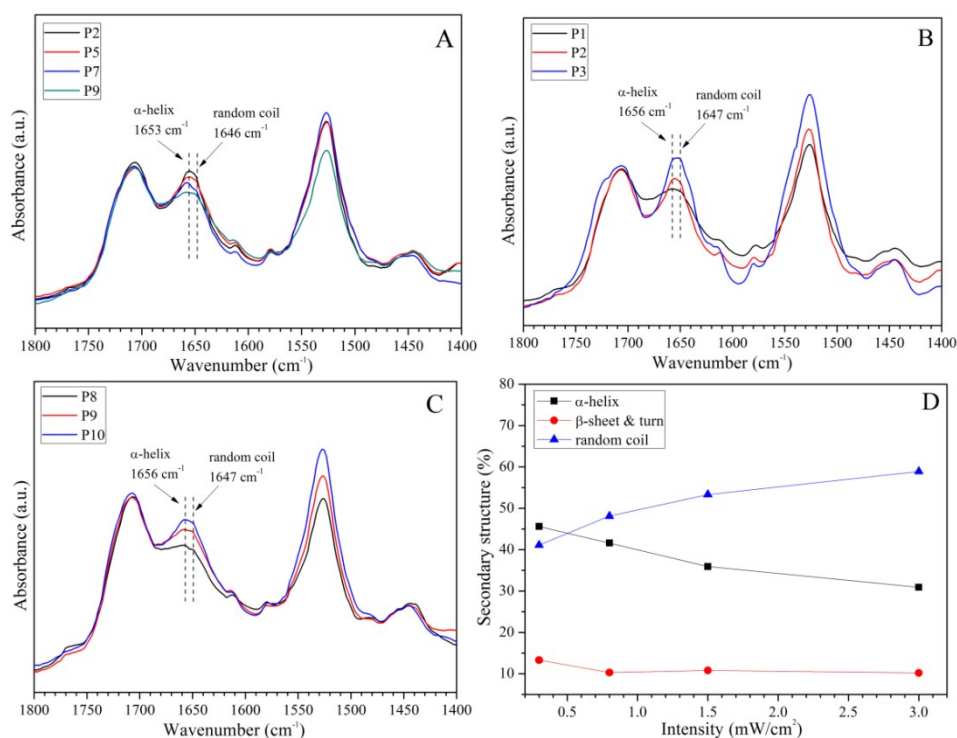

**Figure S10.** FT-IR spectra of P2, P5, P7 and P9 (A), P1-P3 (B) and P8-P10 (C) in the solid state, and the secondary structures of P2, P5, P7 and P9 synthesized at different irradiation intensities (D).

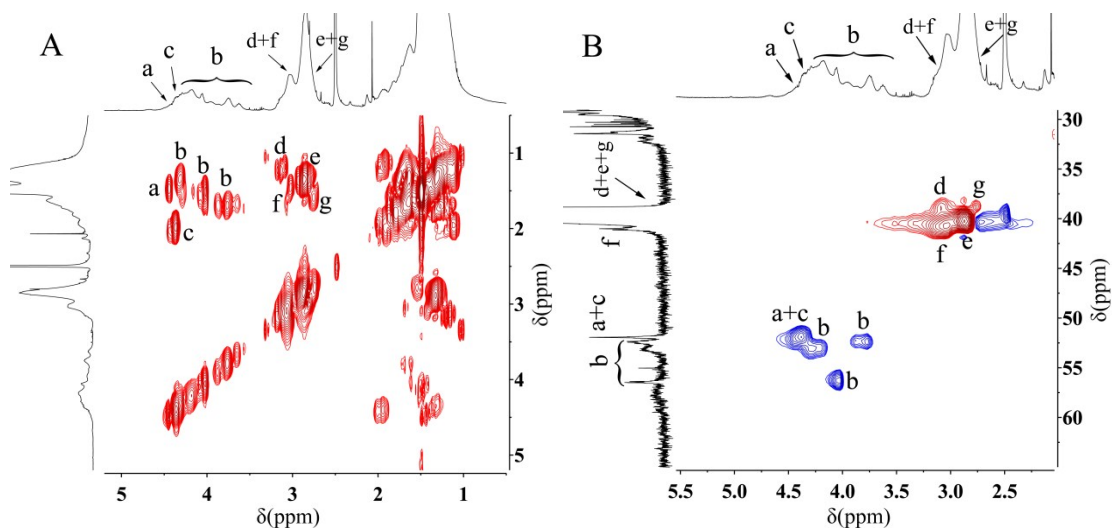

**Figure S11.**  $^1\text{H}$ ,  $^1\text{H}$ -COSY spectrum (A) and  $^1\text{H}$ ,  $^{13}\text{C}$ -HSQC spectrum (B) of P10.

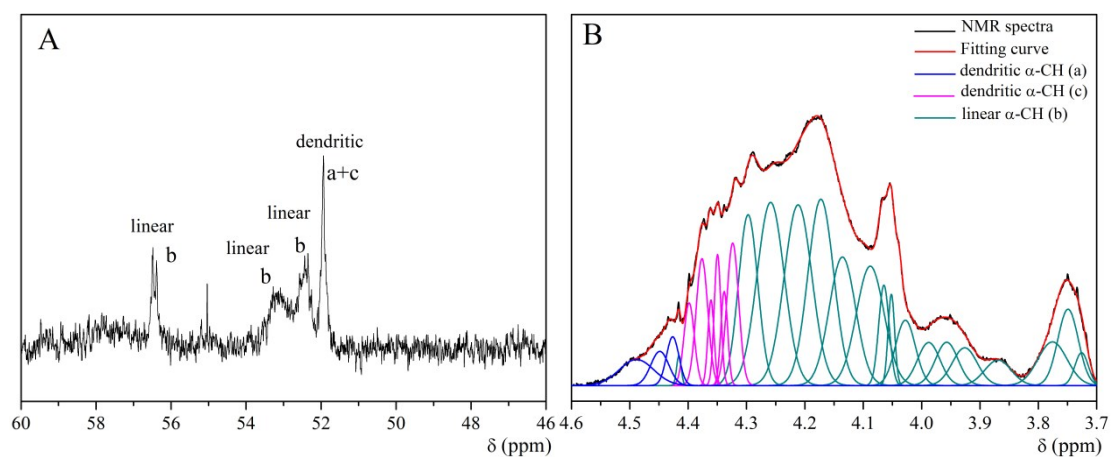

**Figure S12.** Quantitative  $^{13}\text{C}$  NMR spectrum of P10 (A) and the peak fitting for  $\alpha$ -CH in the  $^1\text{H}$  NMR spectrum of P10 to calculate DB value (B).

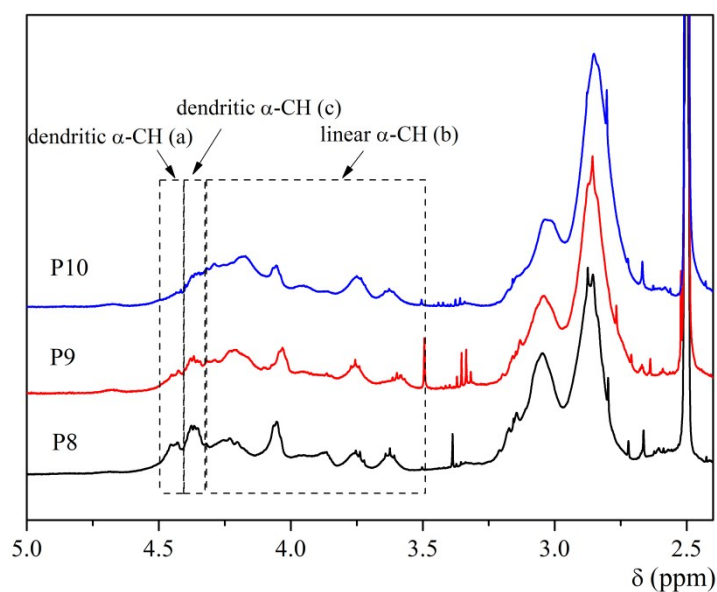

**Figure S13.**  $^1\text{H}$  NMR spectra of P8-P10 synthesized under different  $\text{N}_2$  flow rates.



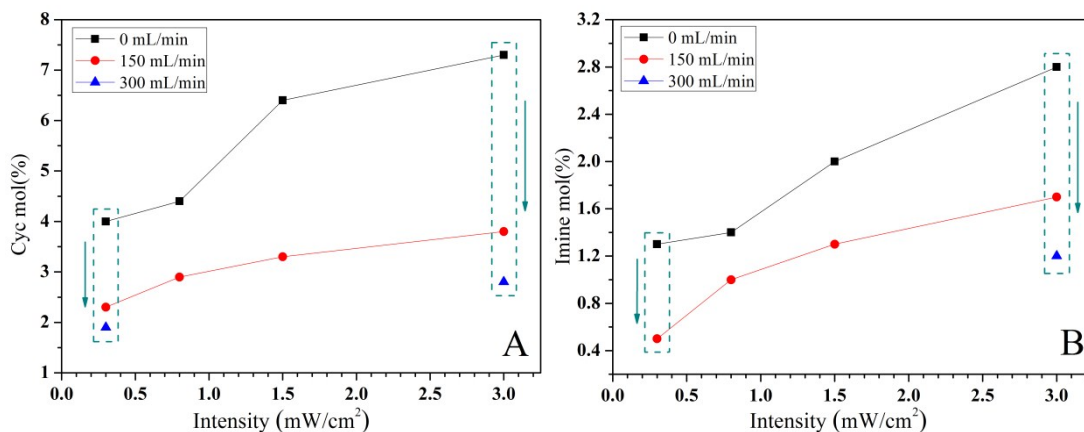

**Figure S14.** The effects of the irradiation intensity and/or N<sub>2</sub> flow rate on the contents of the cyclic dimer (A) and the imine (B).

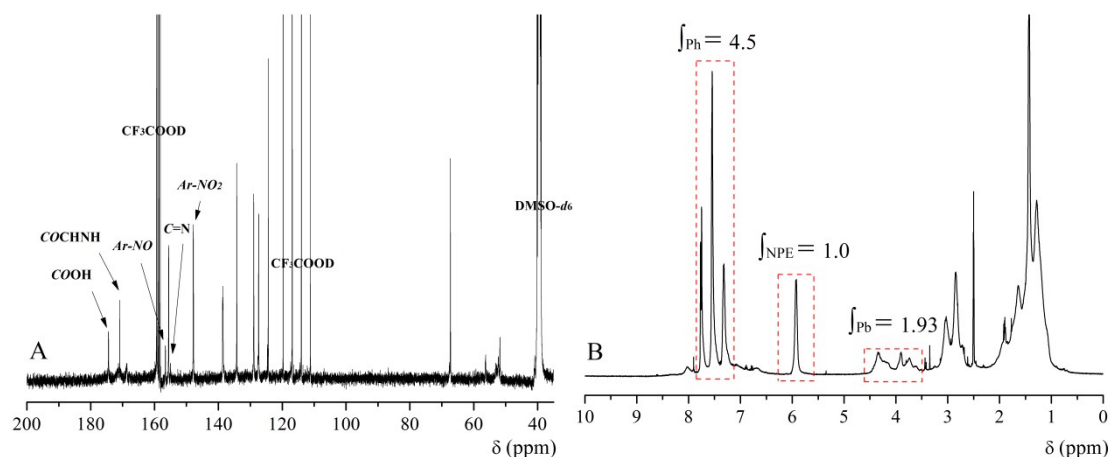

**Figure S15.** Both <sup>13</sup>C NMR spectrum (A) and <sup>1</sup>H NMR spectrum in mixed solvents of DMSO-*d*<sub>6</sub> and CF<sub>3</sub>COOD (v:v = 3:2) of P12.

Note: Imine molar percentage is calculated according to the following procedure. The integration of peak at 5.93 ppm attributable to the methine proton of NPE group is set as the reference  $\int_{\text{NPE}} = 1.0$ ; the theoretical integrated area of phenylic region 7.77~7.31 ppm should be  $\int_{\text{Ph}} = 4.0$  if without imination, so the extra area compared to the theoretical integration ( $\Delta = 4.5 - 4.0 = 0.5$ ) comes from the phenylic signals of imination.

Therefore, imine mole percentage in the whole polypeptide backbone,  $\int_{\text{Pb}} = 1.93$

$$f = \frac{(\int_{\text{NPE}} - \int_{\text{Ph}})/4}{\int_{\text{Pb}}} = \frac{(4.5 - 4)/4}{1.93} = 6.5 \text{ mol\%}.$$
